# Supplementary material
Source: PubMed Central journal article supplement (PMC9606478)
Supplement: mmc1.pdf [file mmc1.pdf]

The American Journal of Human Genetics, Volume 109

**Supplemental information**

**A cross-species approach using an *in vivo* evaluation platform in mice demonstrates that sequence variation in human *RABEP2* modulates ischemic stroke outcomes**

**Han Kyu Lee, Do Hoon Kwon, David L. Aylor, and Douglas A. Marchuk**

**Figure S1**

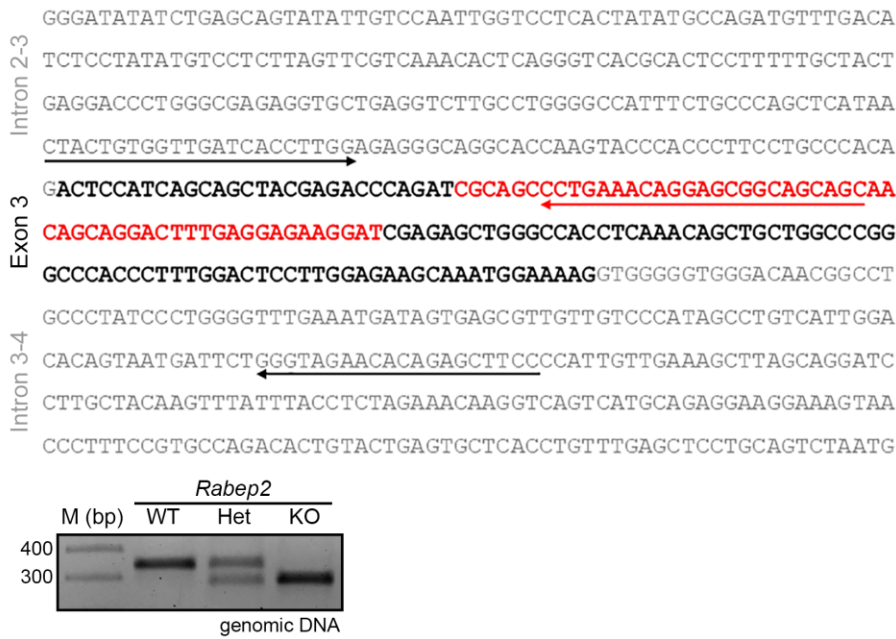

**Figure S1. CRISPR/Cas9 editing creates a 55-nucleotide deletion in Exon 3 of the *Rabep2* gene.** Genomic DNA sequence shows Exon 3 (in bold font) and adjacent Introns (in gray font) of *Rabep2*. A 55-nucleotide deletion indicated by red font was generated by CRISPR/Cas9 RNP using a single-guide RNA (red arrow). Forward and reverse PCR primers (black arrows) for amplification of genomic region detects a 55-nucleotide deletion in both Het and KO of *Rabep2* mice.

**Figure S2**

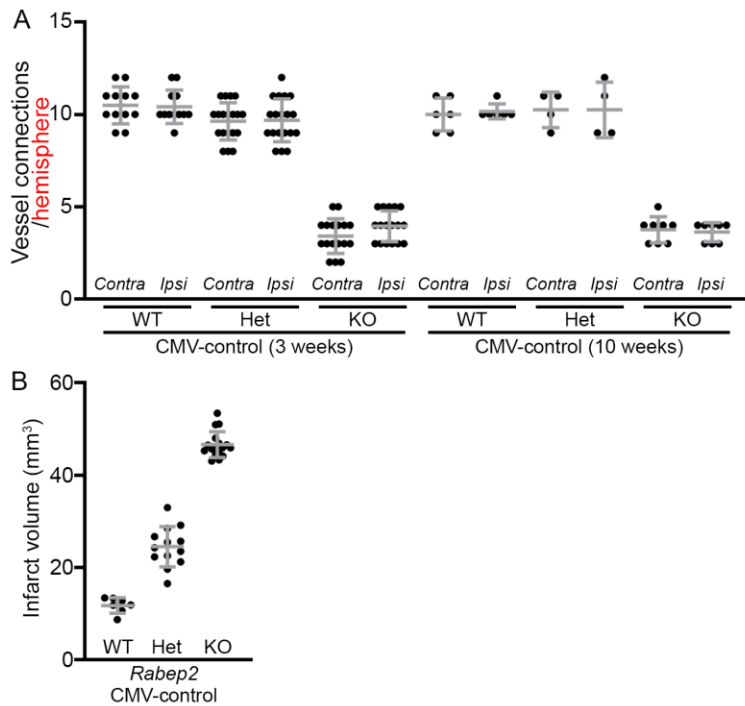

**Figure S2. Phenotypes of the collateral vessel density and the infarct volume for *Rabep2* KO mice are not affected by AAV injections. (A)** The scatter plots show the number of collateral vessel connections of each hemisphere, 3 and 10 weeks after AAV injections. The total number of animals for *Rabep2* WT, Het, and KO either 3 or 10 weeks after CMV-control are 12, 19, 17, 6, 7, and 8 animals, respectively. **(B)** The scatter plots present the infarct volume of each animal injected with CMV-control. The total number of animals for *Rabep2* WT, Het, and KO are 7, 13, and 17 mice, respectively.

**Figure S3**

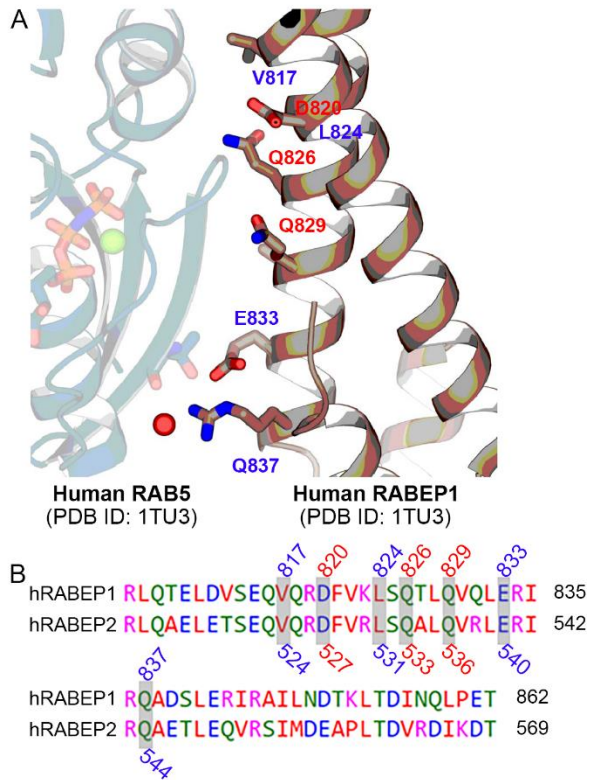

**Figure S3. Interaction interface of human RABEP1 and human RAB5 complex. (A)** Interaction interface between human RABEP1 and human RAB5 was previously experimentally confirmed. The interaction key residues are shown either in red (experimentally confirmed) or in blue (structurally predicted). A water molecule is shown as red sphere and a magnesium atom is shown as green sphere. **(B)** Sequence alignment between human RABEP1 and human RABEP2. Key interaction residues with RAB5 are highlighted in gray.

**Figure S4**

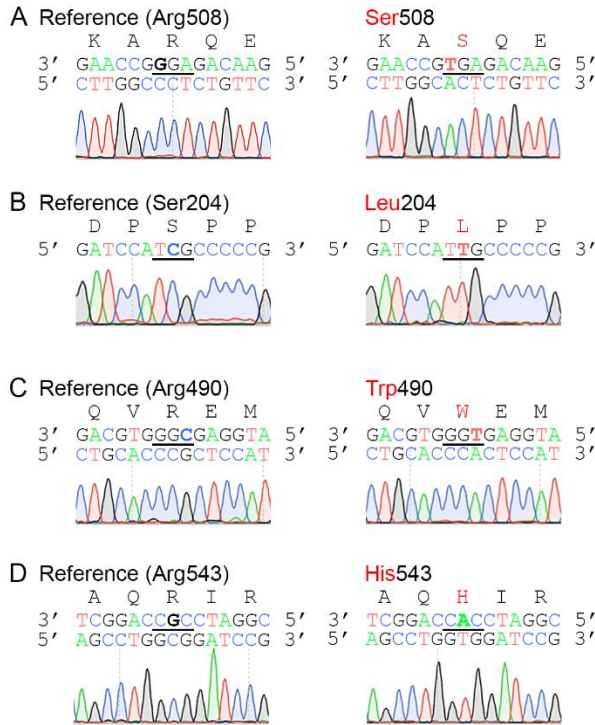

**Figure S4. Sanger sequencing validation of 4 human RABEP2 coding variants.** The chromatograms show the sequences of nonsynonymous coding SNP alleles between reference (WT) and coding variant in human RABEP2. **(A)** p.Arg508Ser: amino acid substituted to Ser (serine) from Arg (arginine) at amino acid position 508. **(B)** p.Ser204Leu: amino acid substituted to Leu (leucine) from Ser (serine) at amino acid position 204. **(C)** p.Arg490Trp: amino acid substituted to Trp (tryptophan) from Arg (arginine) at amino acid position 490. **(D)** p.Arg543His: amino acid substituted to His (histidine) from Arg (arginine) at amino acid position 543.

**Figure S5**

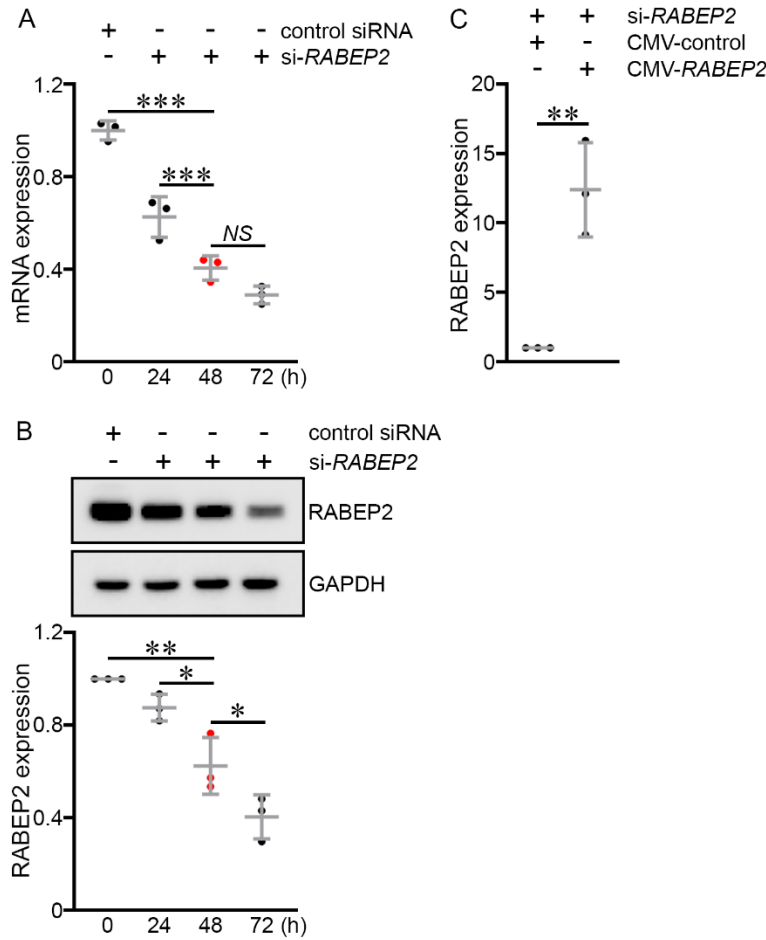

**Figure S5. Efficiency of human *RABEP2* knockdown in human microvascular endothelial cells (HMECs) using siRNA. (A)** Nonspecific (control) or human *RABEP2*-specific siRNA were transfected into HMECs for 72 hours. *RABEP2* mRNA levels normalized to *GAPDH* control were determined by qRT-PCR. Experiments were performed three times. Data represent the mean  $\pm$  SD and statistical significance was determined by one-way ANOVA followed by Tukey's multiple comparison test (\*\* $p < 0.001$ ; NS, not significant). **(B)** Western blots were performed to detect *RABEP2* in HMECs transfected with either control siRNA or *RABEP2*-specific siRNA. Levels of *RABEP2* protein were normalized to *GAPDH* protein levels (control (0 h) sets to 1). Experiments

were performed three times. Data represent the mean  $\pm$  SD and statistical significance was determined by one-way ANOVA followed by Tukey's multiple comparison test (\*  $p < 0.05$  and \*\*  $p < 0.01$ ). **(C)** Levels of RABEP2 protein were increased by infection of CMV-*RABEP2* after knock-down of *RABEP2* for 2 days. Levels of RABEP2 protein normalized to GAPDH protein levels were determined by western blots experiments (control sets to 1). Experiments were performed three times. Data represent the mean  $\pm$  SD and statistical significance was determined by two-tailed Student's *t* test (\*\*  $p < 0.01$ ).

**Figure S6**

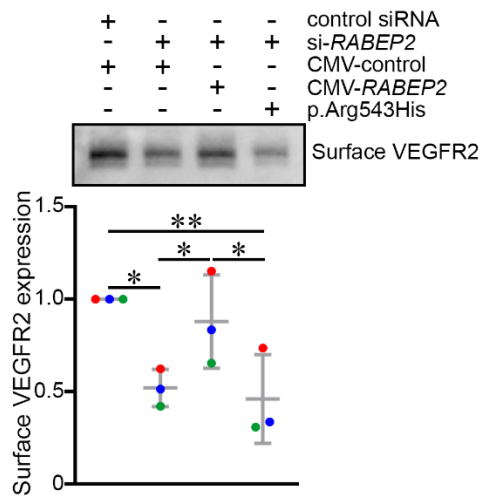

**Figure S6. Wild-type human *RABEP2* rescues cell surface levels of VEGFR2 but p.Arg543His *RABEP2* does not.** A surface biotinylation assay was performed in HMECs to measure the level of VEGFR2 on the endothelial cell membrane. After knock-down of *RABEP2*, levels of cell membrane VEGFR2 were increased to near normal levels by infection of CMV-*RABEP2* WT, but by not the p.Arg543His coding variant. Experiments were performed in triplicate with the control for each experiment (control siRNA with the CMV-control set at a value of 1). Each experimental group is then indicated by a different colored dot. Data represent the mean ± SD and statistical significance was determined by two-way ANOVA followed by Tukey's multiple comparison test (\*  $p < 0.05$  and \*\*  $p < 0.01$ ).



**Figure S7**

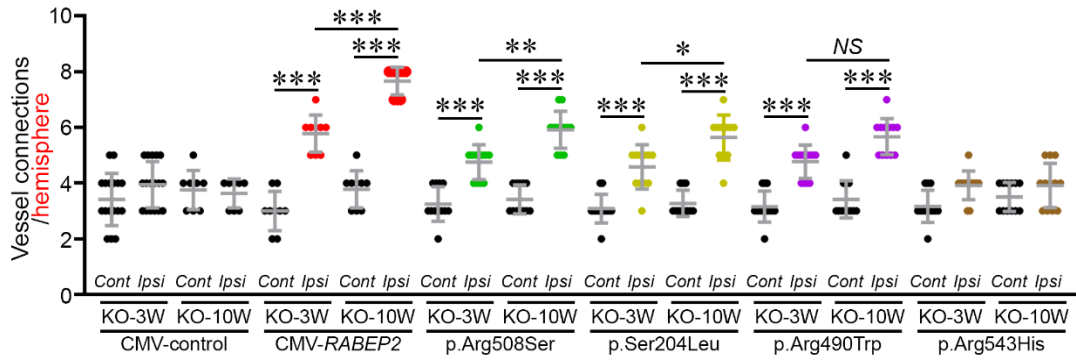

**Figure S7. Human RABEP2 coding variant p.Arg543His shows no rescue of collateral vessel connections at 3 and 10 weeks after AAV injections.** The scatter plots show the number of collateral vessel connections between the ACA and MCA of each hemisphere, 3 and 10 weeks after AAV injections. The total number of animals for *Rabep2* KO either 3 or 10 weeks after injections of CMV-control, *Rabep2* KO either 3 or 10 weeks after injections of CMV-*RABEP2*, *Rabep2* KO either 3 or 10 weeks after injections of CMV-*RABEP2*-p.Arg508Ser, *Rabep2* KO either 3 or 10 weeks after injections of CMV-*RABEP2*-p.Ser204Leu, *Rabep2* KO either 3 or 10 weeks after injections of CMV-*RABEP2*-p.Arg490Trp, and *Rabep2* KO either 3 or 10 weeks after injections of CMV-*RABEP2*-p.Arg543His are 17, 8, 9, 9, 12, 12, 12, 11, 13, 12, 12 and 12 animals, respectively. Data represent the mean  $\pm$  SD and statistical significance was determined by one-way ANOVA followed by Tukey's multiple comparison test (\*  $p < 0.05$ ; \*\*\*  $p < 0.001$ ; NS, not significant).

## Tables

| Chr      | Position    | rsID               | Coding SNP         | Allele |             |                   | <i>In silico</i> prediction |                    |
|----------|-------------|--------------------|--------------------|--------|-------------|-------------------|-----------------------------|--------------------|
|          |             |                    |                    | count  | number      | frequency         | SIFT                        | PolyPhen           |
| 16       | 28936427    | rs115529621        | p.Ala20SSer        | 3562   | 167926      | 0.021211724       | 0.16                        | 0                  |
|          | 28916802    | rs200118396        | <b>p.Arg508Ser</b> | 239    | 271860      | 0.000879129       | 0 <sup>†</sup>              | 0.968 <sup>†</sup> |
|          | 28922259    | rs201270750        | p.Thr347Ser        | 137    | 278198      | 0.000492455       | 0.27                        | 0.145              |
|          | 28922244    | rs202177661        | p.Val352Leu        | 121    | 278060      | 0.000435158       | 0.36                        | 0.015              |
|          | 28917045    | rs201409528        | p.Val491Met        | 111    | 280082      | 0.000396313       | 0.09                        | 0.207              |
|          | 28917367    | rs559738470        | p.Gln466Glu        | 107    | 219272      | 0.000487978       | 1                           | 0.006              |
|          | 28925840    | rs769480150        | <b>p.Ser204Leu</b> | 91     | 275124      | 0.00033076        | 0.01 <sup>†</sup>           | 0.978 <sup>†</sup> |
|          | 28917045    | rs201409528        | p.Val491Leu        | 80     | 280082      | 0.000285631       | 0.42                        | 0.026              |
|          | 28919991    | rs192852294        | p.Ser395Leu        | 80     | 278986      | 0.000286753       | 0.84                        | 0                  |
|          | 28916806    | rs766728154        | p.Gln507Leu        | 57     | 272456      | 0.000209208       | 0 <sup>†</sup>              | 0.127              |
|          | 28931252    | rs199904424        | p.Ser96Asn         | 49     | 272106      | 0.000180077       | 0.14                        | 0.988 <sup>†</sup> |
|          | 28931168    | rs758567963        | p.Arg124His        | 42     | 278940      | 0.00015057        | 0.29                        | 0.019              |
|          | 28917048    | rs184144701        | <b>p.Arg490Trp</b> | 34     | 280036      | 0.000121413       | 0 <sup>†</sup>              | 0.995 <sup>†</sup> |
|          | 28922430    | rs779592285        | p.Arg322Gln        | 32     | 280052      | 0.000114264       | 0.33                        | 0.36               |
|          | 28925870    | rs372536339        | p.Thr194Met        | 26     | 275034      | 9.45338E-05       | 0.16                        | 0.513 <sup>‡</sup> |
|          | 28925859    | rs764221819        | p.Pro198Ser        | 24     | 244096      | 9.8322E-05        | 0.28                        | 0.003              |
|          | 28917442    | rs750752217        | p.Arg441Cys        | 21     | 206462      | 0.000101714       | 0 <sup>†</sup>              | 0.993 <sup>†</sup> |
|          | 28925703    | rs372007568        | p.Pro250Ser        | 21     | 277996      | 7.55407E-05       | 0.07                        | 0.063              |
|          | 28925904    | rs550518363        | p.Arg183Cys        | 21     | 273966      | 7.66518E-05       | 0.02 <sup>†</sup>           | 0.549 <sup>‡</sup> |
|          | 28925694    | rs200278634        | p.Arg253Cys        | 20     | 278590      | 7.17901E-05       | 0.03 <sup>†</sup>           | 0.828 <sup>‡</sup> |
|          | 28916281    | rs376299848        | p.Asp565Tyr        | 19     | 279334      | 6.80189E-05       | 0 <sup>†</sup>              | 0.978 <sup>†</sup> |
|          | 28926097    | rs199981658        | p.Glu147Gln        | 19     | 249182      | 7.62495E-05       | 0.01 <sup>†</sup>           | 0.945 <sup>†</sup> |
|          | 28916280    | rs759288035        | p.Asp565Val        | 17     | 279320      | 6.08621E-05       | 0 <sup>†</sup>              | 0.93 <sup>†</sup>  |
| 28917492 | rs369261936 | p.Thr424Met        | 17                 | 234784 | 7.2407E-05  | 0.21              | 0.104                       |                    |
| 28916346 | rs527458355 | <b>p.Arg543His</b> | 16                 | 273404 | 5.85215E-05 | 0 <sup>†</sup>    | 0.999 <sup>†</sup>          |                    |
| 28922226 | rs748834926 | p.Arg358Trp        | 16                 | 277234 | 5.7713E-05  | 0 <sup>†</sup>    | 0.948 <sup>†</sup>          |                    |
| 28925850 | rs375415976 | p.Arg201Trp        | 16                 | 275346 | 5.81087E-05 | 0.03 <sup>†</sup> | 0.006                       |                    |

**Table S1. *In silico*-predicted functional consequences of coding variants of human RABEP2.** The list is based on human population data obtained from the Genome Aggregation Database (gnomAD) and functional effects of coding SNPs were predicted by two independent *in silico* algorithms, SIFT and PolyPhen-2. A cross (†) indicates a strong prediction of functional damage. A two-barred cross (‡) indicates possibly damaging. The four variants chosen for further study are represented in bold font.

**Table S2. Raw data for all Figures.** The Excel spreadsheet contains the numerical values with detailed statistical information and array information used to generate all of the figures.
